# Supplementary material
Source: PubMed Central journal article supplement (PMC7605285)
Supplement: NIHMS1615308-supplement-Supplement.pdf [file NIHMS1615308-supplement-Supplement.pdf]

# **TRPV4-mediates oscillatory fluid shear mechanotransduction in mesenchymal stem cells in part via the primary cilium**

Michele A. Corrigan<sup>1,2,3</sup>, Gillian P. Johnson<sup>1,2,3</sup>, Elena Stavenschi<sup>1,2,3</sup>, Mathieu Riffault<sup>1,2,4</sup>, Marie-Noelle Labour<sup>1,2,3</sup>, David A. Hoey<sup>1,2,3,4</sup>.

<sup>1</sup>Trinity Centre for Bioengineering, Trinity Biomedical Sciences Institute, Trinity College Dublin, Dublin 2, Ireland.

<sup>2</sup>Dept. of Mechanical and Manufacturing Engineering, School of Engineering, Trinity College Dublin, Dublin 2, Ireland.

<sup>3</sup>Dept. of Mechanical, Aeronautical and Biomedical Engineering, University of Limerick, Ireland.

<sup>4</sup>Advanced Materials and Bioengineering Research Centre, Trinity College Dublin & RCSI, Dublin 2, Ireland.

\*Corresponding Author: Prof. David A. Hoey, Tel: +353 1896 1359, email: [dahoey@tcd.ie](mailto:dahoey@tcd.ie)

## Supplementary Figures:

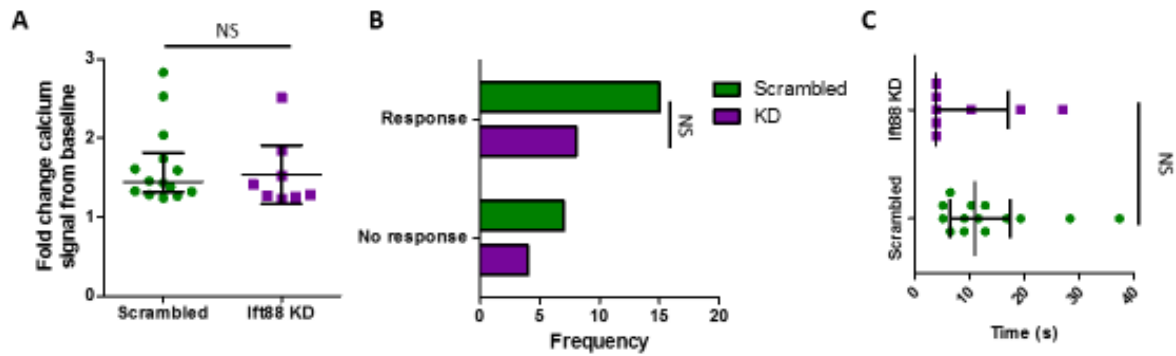

**Supplementary figure 1:** (a) Median and interquartile range of fold increase in calcium at first peak following application of GSK101 in cells transfected with scrambled siRNA or siRNA targeting IFT88, Mann Whitney test, NS  $p > 0.05$ . (b) Frequency of calcium response in MSCs exposed to GSK101, Fisher's exact test, NS  $p > 0.05$ . (c) Time to first peak for individual cells following application of GSK101 at time 0s. Bars mark Median and interquartile range, Scrambled  $N=4$ ,  $n=20$ , IFT88 KD  $N=4$ ,  $n=12$ , Mann Whitney test, NS  $p > 0.05$ .

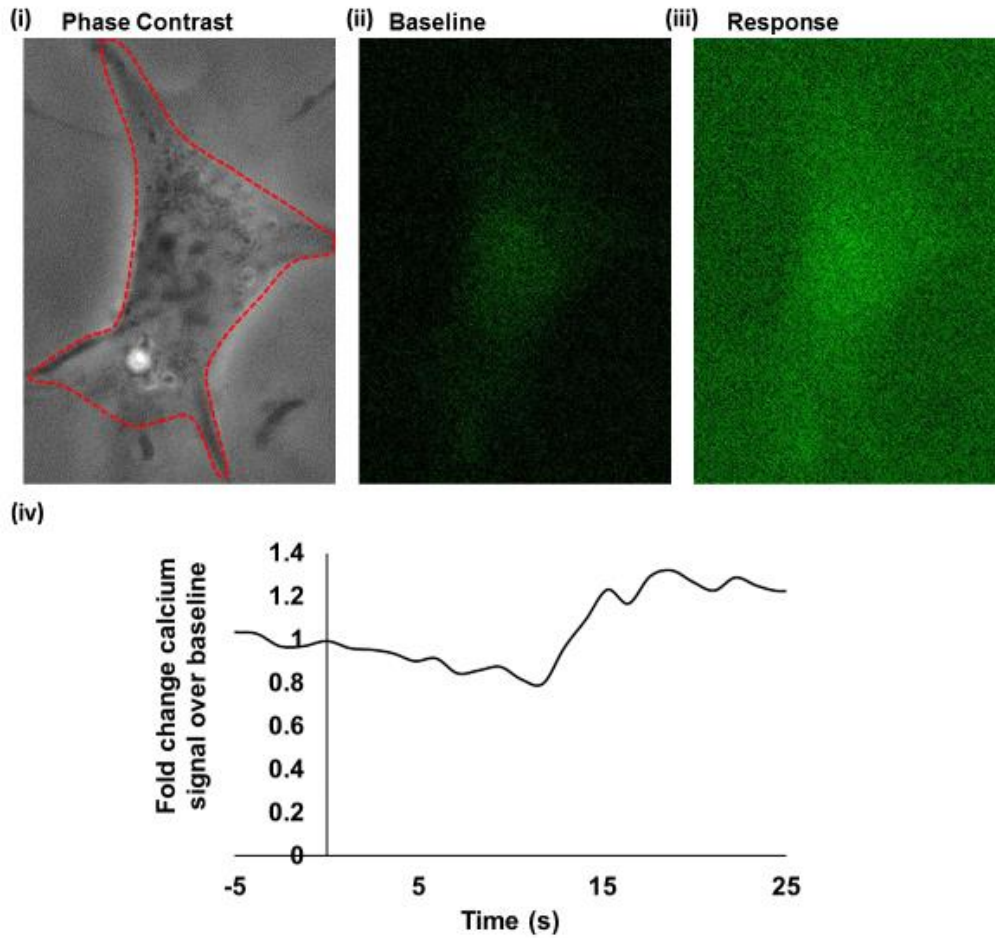

**Supplementary Figure 2:** Representative images of MSCs during calcium peak. **(i)** Phase contrast image of MSC at 40x (NA 0.6), red line marks the region where intensity is measured. **(ii)** **(iii)** Fluorescent image of same cell under 488nm filter, **(ii)** before calcium peak and **(iii)** at peak calcium. **(iv)** Trace of fluorescence signal for the cell in (i)-(iii) over time normalized to baseline control and corrected for background fluorescence.

**Supplementary Table 1:** Primer sequences and concentrations employed in quantitative PCR analysis.

| <b>Gene</b> | <b>Tm (°C)</b> | <b>Primer concentration</b> | <b>Sequence</b>              | <b>Amplicon Size</b> |
|-------------|----------------|-----------------------------|------------------------------|----------------------|
| 18S         | 60             | 400 nM                      | 5'-GTAACCCGTTGAACCCATT-3'    | 151bp                |
|             |                |                             | 3'-CCATCCAATCGGTAGTAGCG-5'   |                      |
| Cox2        | 60             | 400 nM                      | 5'-ACTCATAGGAGAGACTATCAAG-3' | 147bp                |
|             |                |                             | 3'-GAGTGTGTTGAATTCAGAGG-5'   |                      |
| Opn         | 60             | 400 nM                      | 5'-GGATGAATCTGACGAATCTC-3'   | 188bp                |
|             |                |                             | 3'-GCATCAGGATACTGTTTCATC-5'  |                      |
| TRPV4       | 60             | 1x                          | Mm00499025_m1                | 56bp                 |
